# Supplementary material for: MYBL2 is a Novel Independent Prognostic Biomarker and Correlated with TMB in pancreatic cancer
Source: PubMed Central journal article supplement (PMC11212096; doi:10.7150/jca.96320), 2024-06-11

1 **Supplementary Figure S1** The correlation between MYB family genes  
2 and the stage,grade of pancreatic cancer. (A) MYB gene violin plots of  
3 patient pathological stage by GEPIA.(B) MYBL1 gene violin plots of  
4 patient pathological stage by GEPIA.(C) MYBL2 gene violin plots of  
5 patient pathological stage by GEPIA.(D) Expression of MYB in PAAD  
6 based on tumor grade by UALCANplatform.(E) Expression of MYBL1  
7 in PAAD based on tumor grade by UALCAN platform.(F) Expression of  
8 MYBL2 in PAAD based on tumor grade by UALCAN platform.

9 **Supplementary Figure S2** The correlation between MYB expression and  
10 OS (A), DSS (B) and PFS (C) from TCGA dataset, comparison among  
11 different groups was made by log-rank test. The time ROC(v 0.4) analysis  
12 was used to compare the predictive accuracy of MYB gene for overall  
13 survival (OS)(D), (DSS)(E),(PFS)(F),respectively.

14 **Supplementary Figure S3** The correlation between MYBL1 expression  
15 and OS (A), DSS (B) and PFS (C) from TCGA dataset, comparison among  
16 different groups was made by log-rank test. The time ROC(v 0.4) analysis  
17 was used to compare the predictive accuracy of MYBL1 gene for overall  
18 survival (OS)(D), (DSS)(E),(PFS)(F), respectively.

19

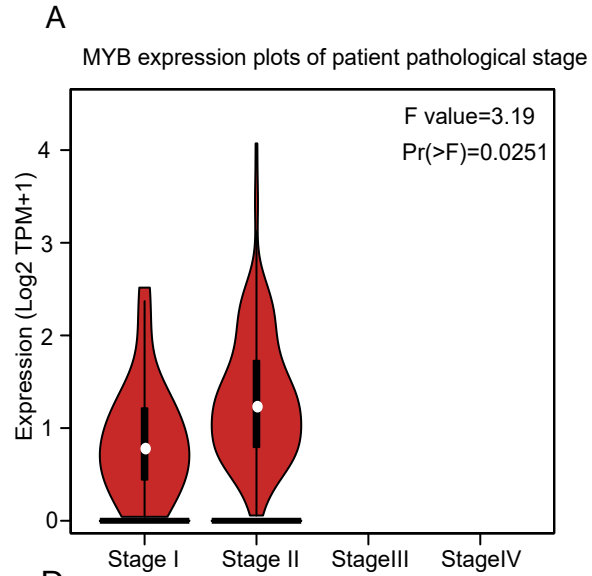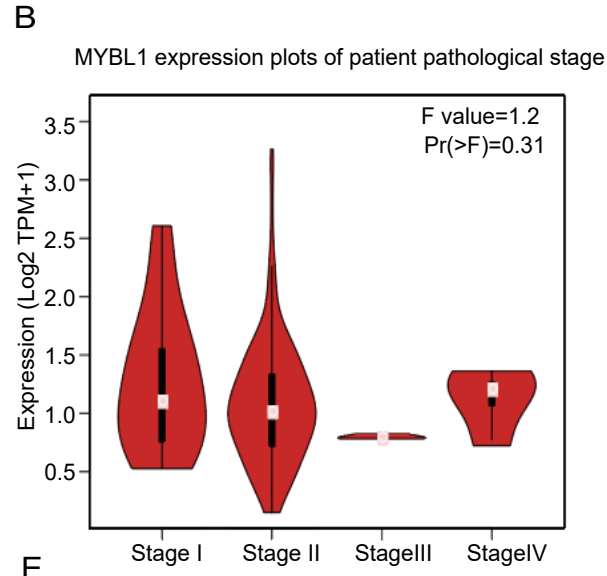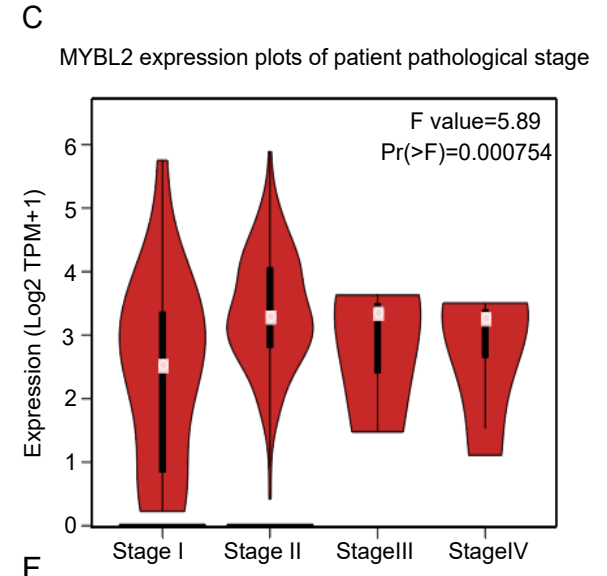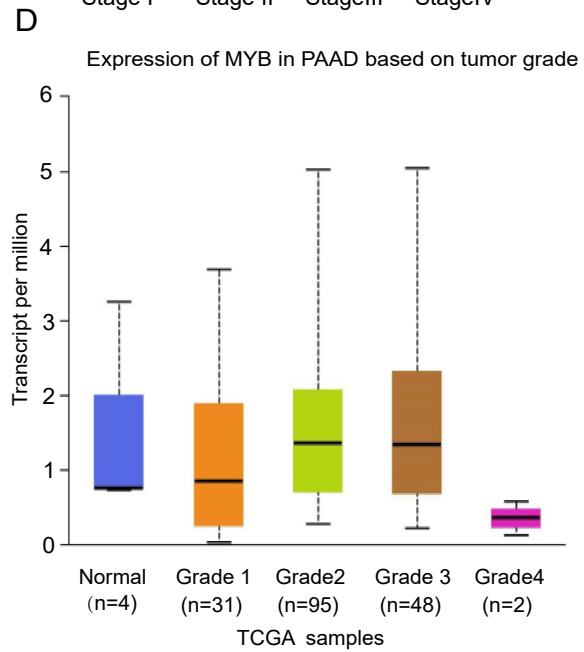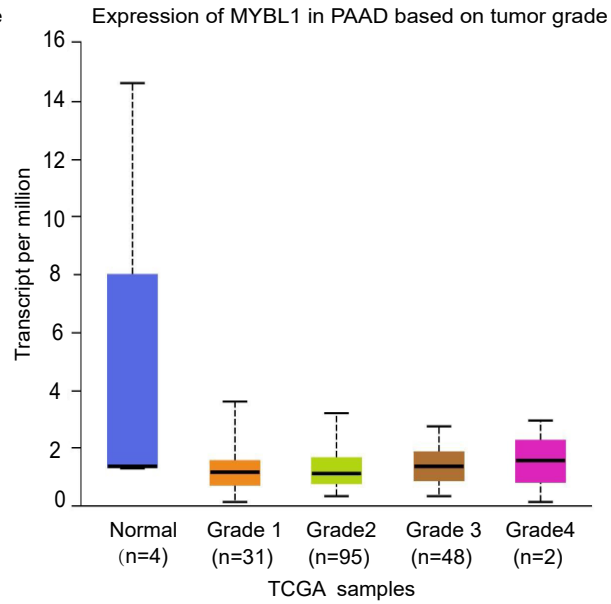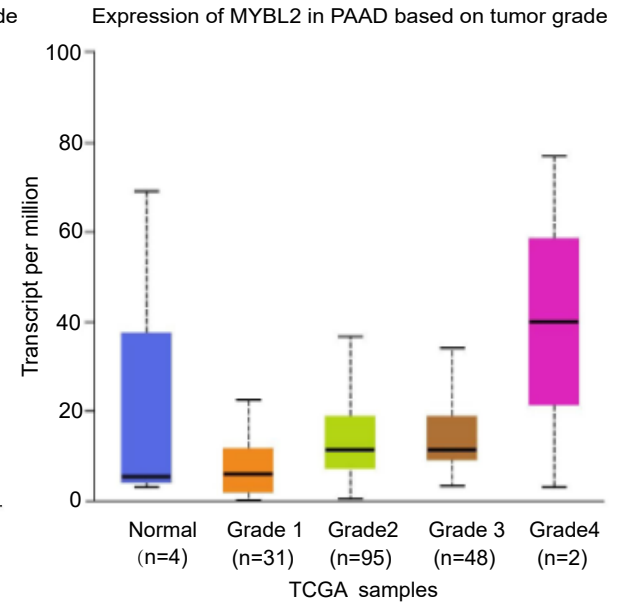

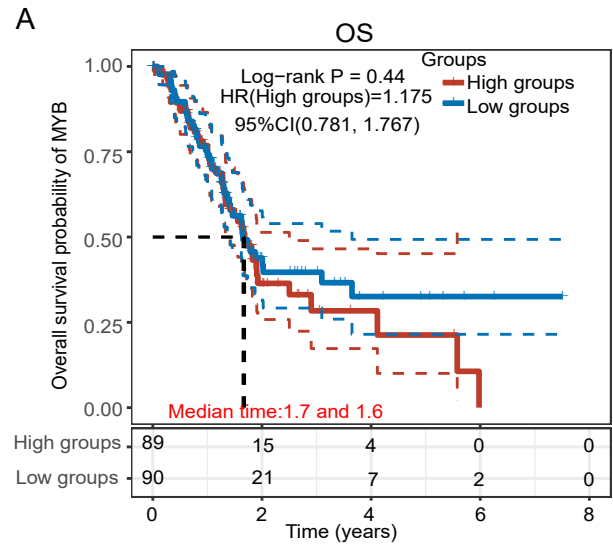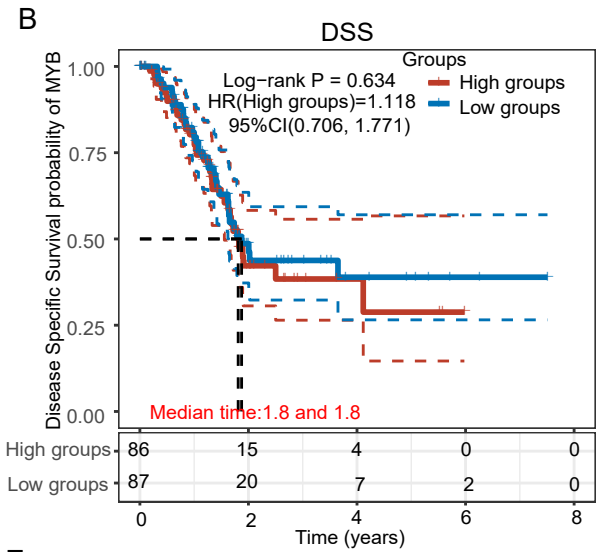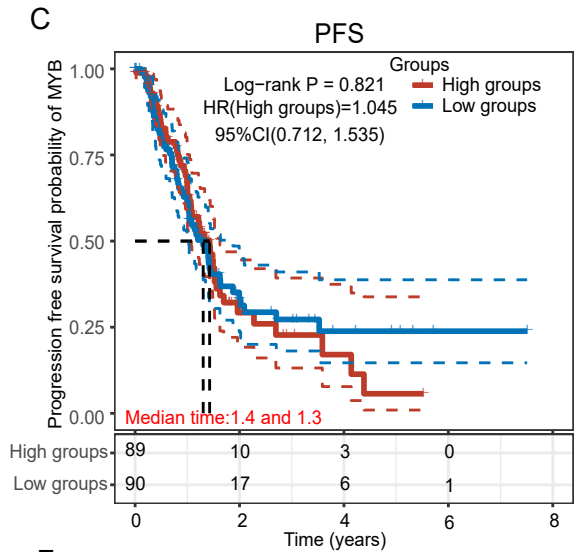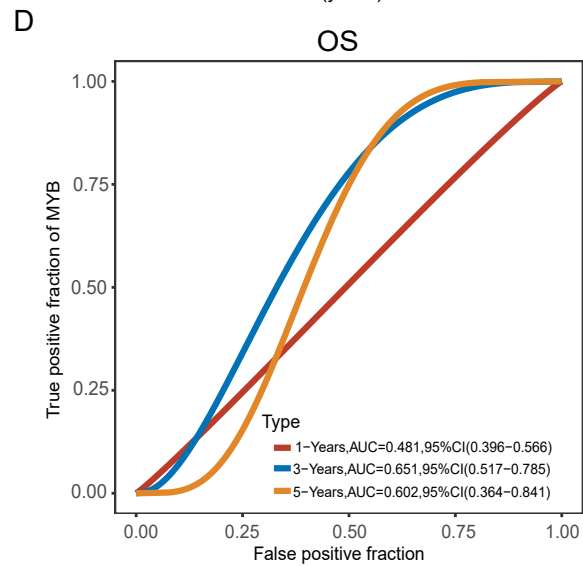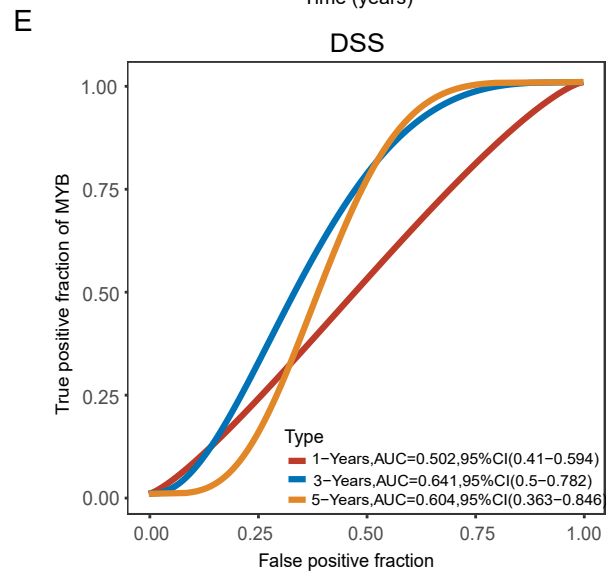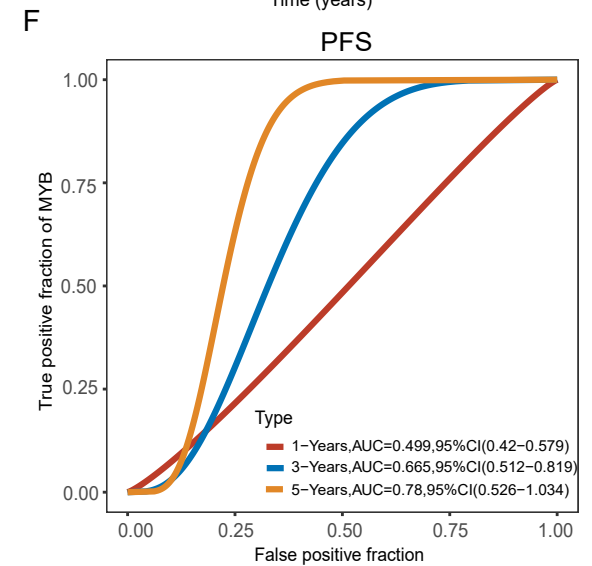

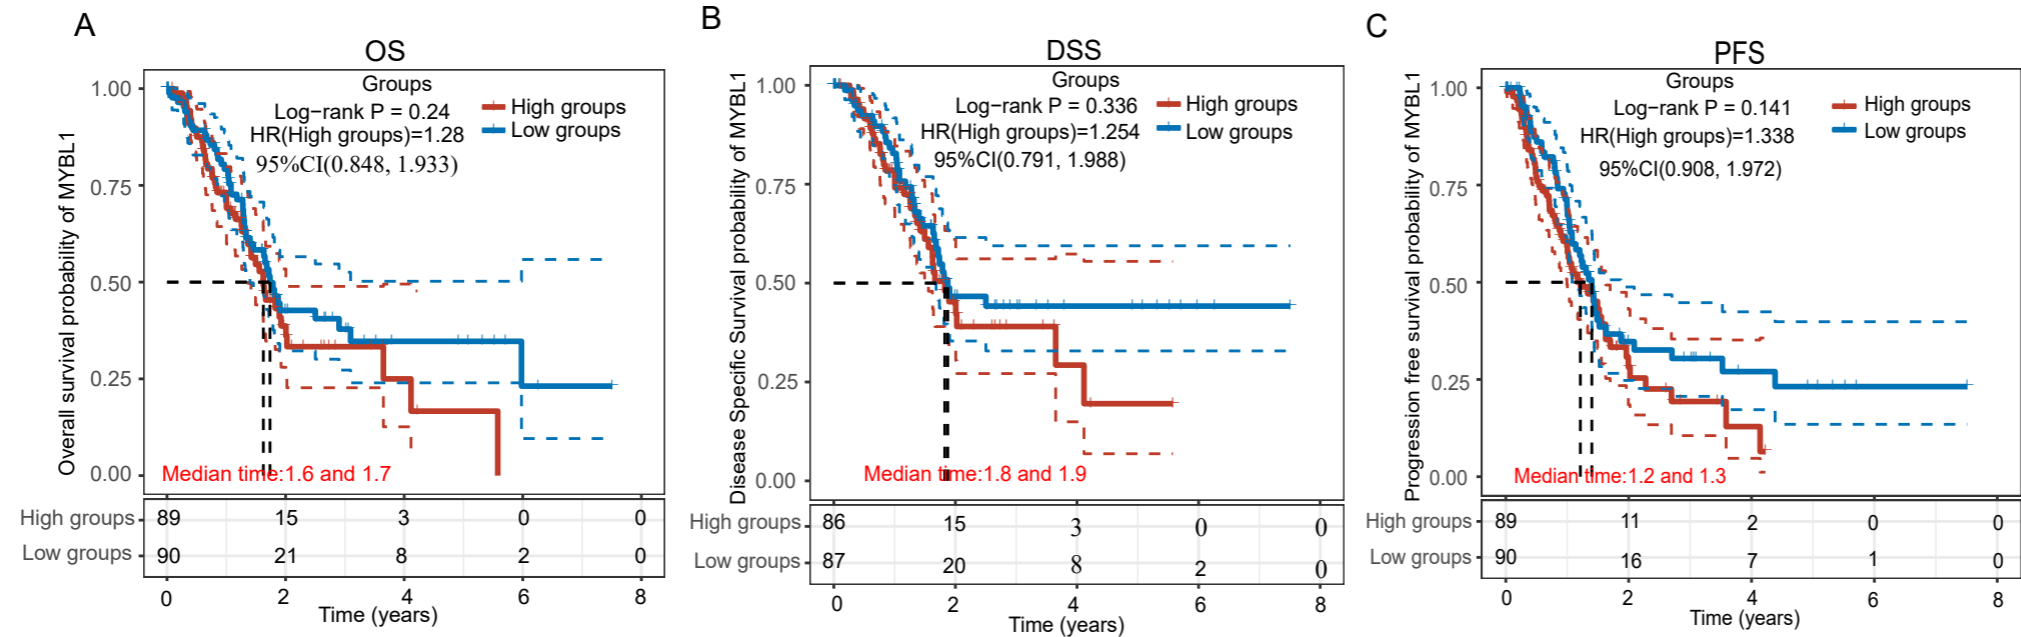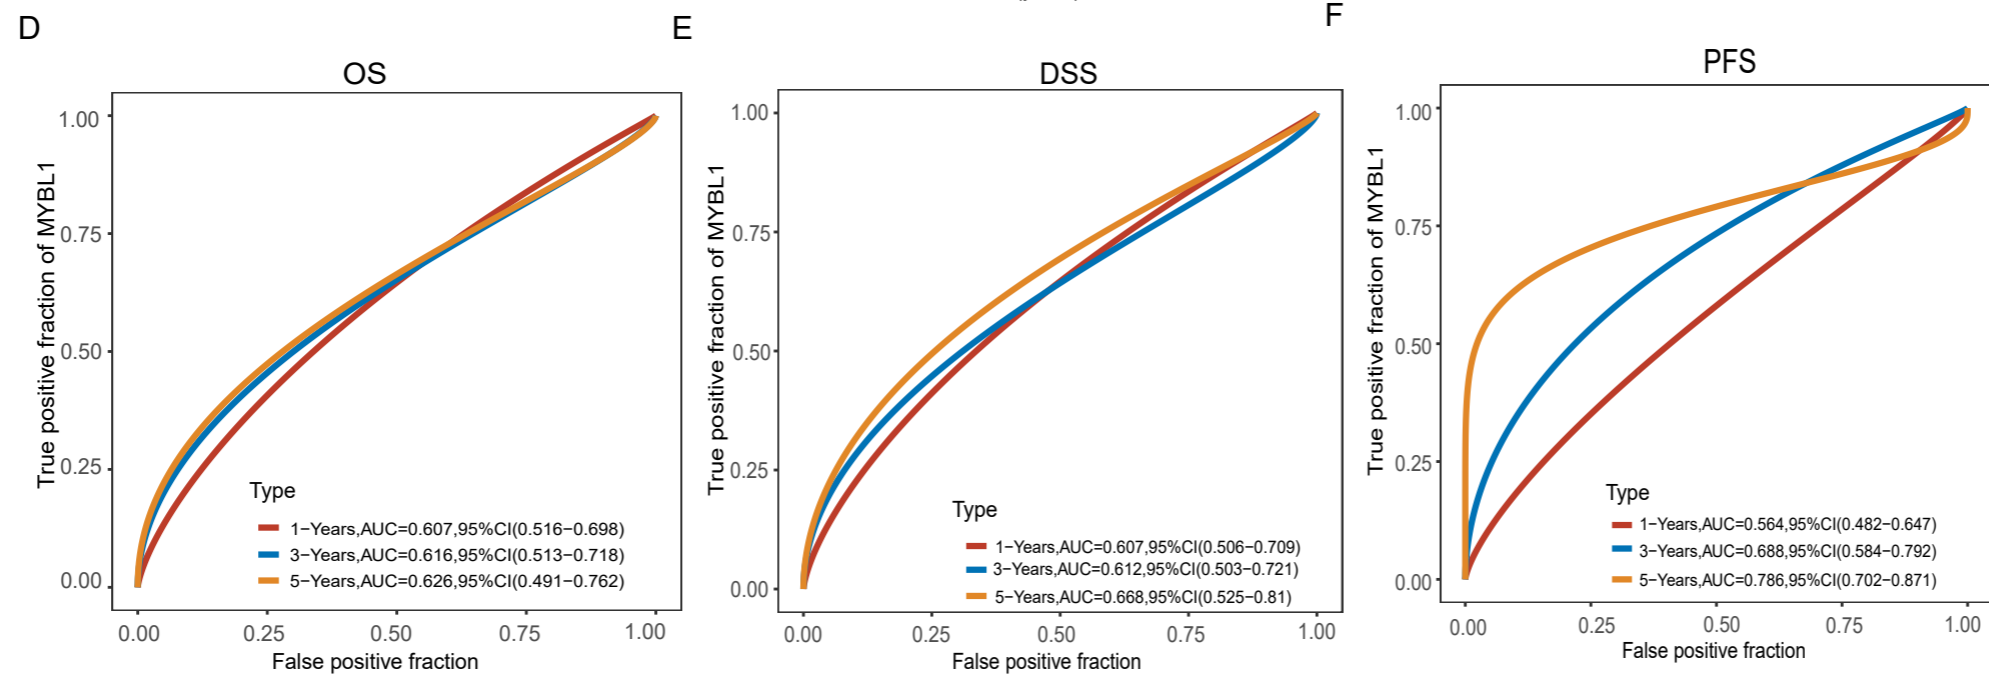

Supplement: jcav15p4360s1.pdf [file jcav15p4360s1.pdf]
